# Supplementary material
Source: publisher figshare collection journal article supplement (https://acs.figshare.com/ndownloader/files/21938310)
Supplement: Supplementary file 1 [file 21938310]

# 1 Supporting figures and tables

## 2 Table of Contents

|    |                                                                                            |   |
|----|--------------------------------------------------------------------------------------------|---|
| 3  | Supporting figures and tables .....                                                        | 1 |
| 4  | Figure S1. An incorrectly predicted pseudogene in strain ScottA.....                       | 2 |
| 5  | Figure S2. Hierarchical cluster analysis of biological replicates of EGD-e and ScottA..... | 3 |
| 6  | Table S1. Bacterial strains. ....                                                          | 4 |
| 7  | Table S2. Overview of genome properties of strains EGD-e and ScottA.....                   | 4 |
| 8  | Table S3. Overview of core genes and genes specific to ScottA and to EGD-e. ....           | 5 |
| 9  | Table S4. Gene Ontology (GO) categories enriched among the strain-specific and             |   |
| 10 | differentially expressed proteins of each strain.....                                      | 5 |
| 11 | Table S5. Master table. ....                                                               | 5 |
| 12 | Table S6. Summary of annotation clusters in the iPtgxDBs. ....                             | 6 |
| 13 | Table S7. Spectral evidence for the novelties identified through the proteogenomics search |   |
| 14 | using MS-GF+ of DDA data for <i>L. monocytogenes</i> strains EGD-e and ScottA. ....        | 6 |
| 15 | Table S8: Summary information of precursors, peptides, and protein groups identified for   |   |
| 16 | EGD-e and ScottA over all conditions using DIA. ....                                       | 7 |
| 17 | Table S9. Summary of library recovery percentage, data completeness, and median CVs for    |   |
| 18 | the DIA dataset. Part of this dataset is also shown in Fig 6. ....                         | 7 |
| 19 | Table S10. List of differentially abundant proteins. ....                                  | 7 |
| 20 | Table S11. Candidate genes for bile resistance and operons for flagellar genes.....        | 8 |
| 21 |                                                                                            |   |
| 22 |                                                                                            |   |

23 **Figure S1. An incorrectly predicted pseudogene in strain ScottA.**

24 Protein evidence for a 207-amino acid protein (3 peptides, 17 PSMs) predicted by Prodigal in L.  
25 monocytogenes strain ScottA. It starts from an alternative start codon TTG, which codes for leucine  
26 in frame -1; the corresponding longer RefSeq protein (282 amino acids) incorrectly annotated as a  
27 pseudogene. Both proteins are predicted to encode for phosphosugar binding transcriptional  
28 regulators, and both harbor the RpiR-like SIS (sugar isomerase) protein domains (IPR035472).  
29

30

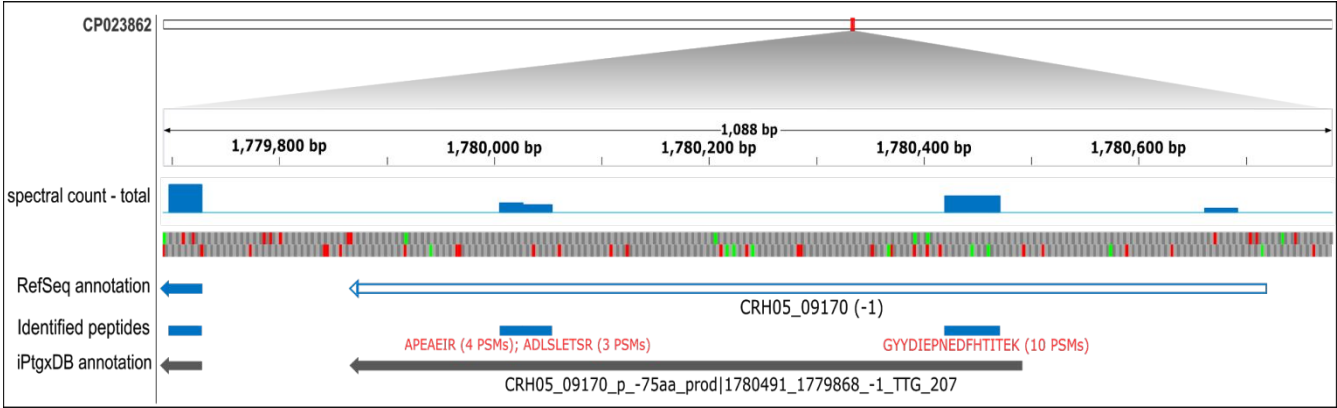

31 **Figure S2. Hierarchical cluster analysis of biological replicates of EGD-e and ScottA.**

32 (A) Unsupervised clustering reveals a high similarity for EGD-e biological replicates across all four  
33 conditions. (B) Unsupervised clustering reveals a high similarity for ScottA biological replicates across  
34 all four conditions.

35 A. EGD-e

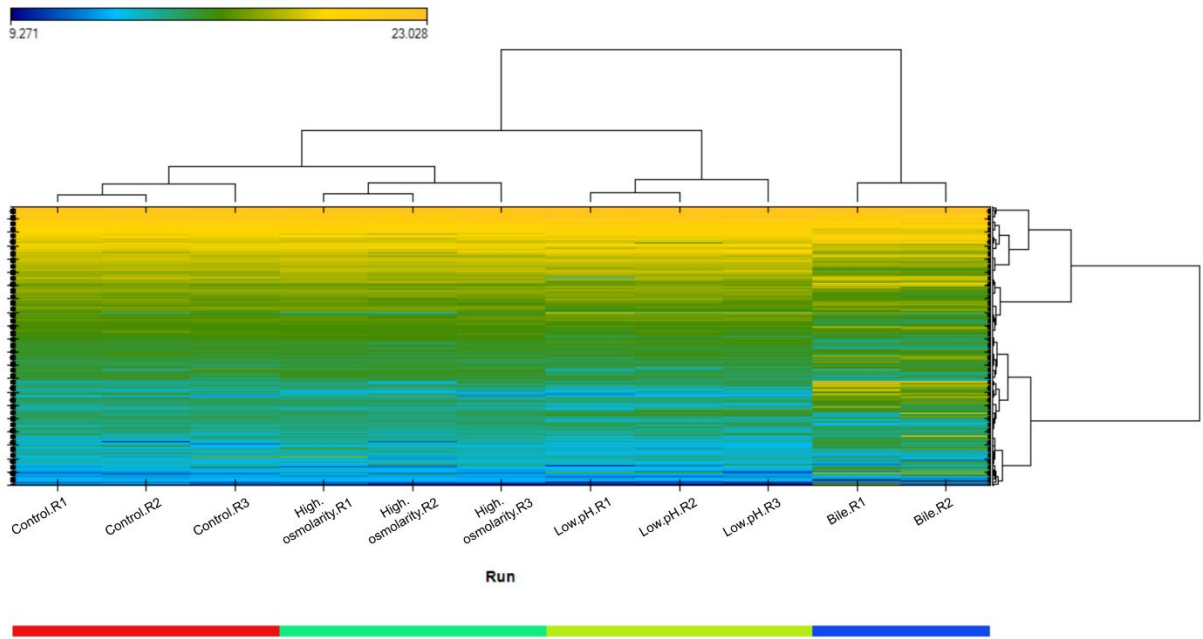

36

37 B. ScottA

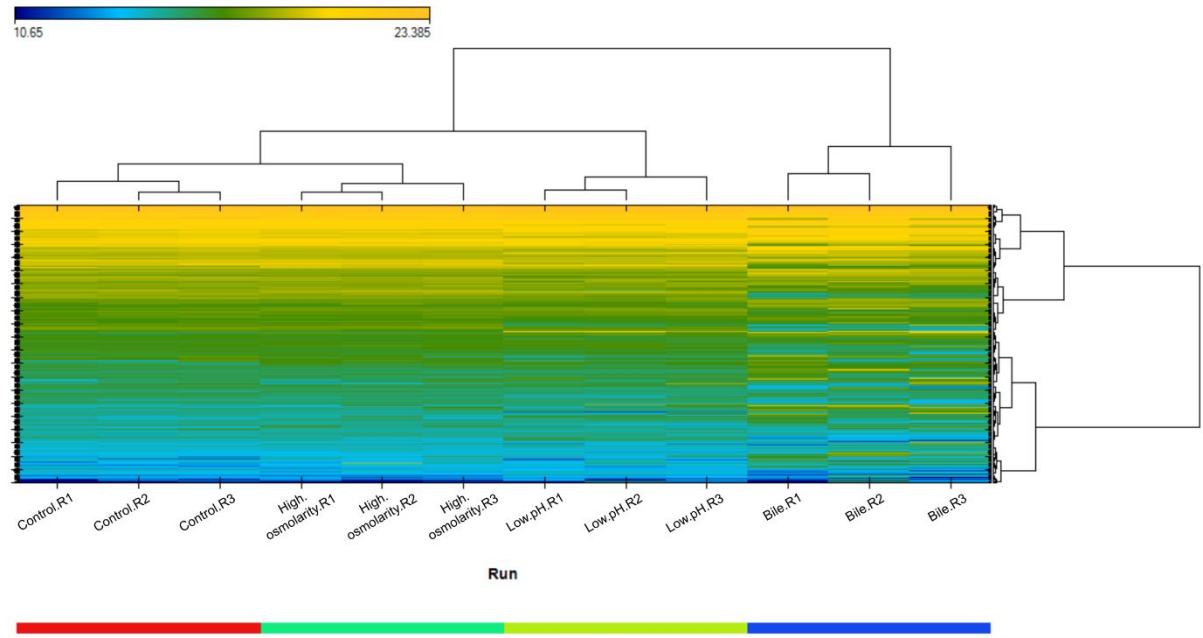

38

39

40 **Table S1. Bacterial strains.**

| Strain no. | Name   | Isolate type                                                     | Serotype |
|------------|--------|------------------------------------------------------------------|----------|
| NF-L101    | EGD-e  | Virulent laboratory strain (guinea pig)*                         | 1/2a     |
| NF-L725    | ScottA | Virulent laboratory strain from a clinical isolate (foodborne)** | 4b       |

41 Source of strains: \* Mackaness GB. The immunological basis of acquired cellular resistance. J Exp  
 42 Med. 1964; 120:105-120. Glaser P, et al. Comparative genomics of *Listeria* species. Science. 2001;294:  
 43 849–852. \*\* Fleming DW, et al. Pasteurized milk as a vehicle of infection in an outbreak of listeriosis.  
 44 N Engl J Med. 1985;312: 404-407. Briers Y, et al. Genome sequence of *Listeria monocytogenes* ScottA,  
 45 a clinical isolate from a food-borne listeriosis outbreak. J Bacteriol. 2011;193: 4284–4285.

46

47 **Table S2. Overview of genome properties of strains EGD-e and ScottA.**

|                                      | <i>L. monocytogenes</i> EGD-e | <i>L. monocytogenes</i> ScottA |
|--------------------------------------|-------------------------------|--------------------------------|
| Genbank accession #                  | CP023861                      | CP023862                       |
| # Chromosomes                        | 1                             | 1                              |
| Size of the chromosome (bp)          | 2,944,523                     | 3,030,813                      |
| G+C content (%)                      | 37.9                          | 37.9                           |
| Coverage (PacBio)                    | 260                           | 283                            |
| Coverage (Illumina MiSeq)            | 302                           | 435                            |
| Total number of protein-coding genes | 2,887                         | 2,979                          |
| Number of rRNA operons (16S-23S-5S)  | 6                             | 6                              |
| Number of tRNA genes                 | 67                            | 67                             |
| Number of pseudogenes                | 29                            | 30                             |
| Prophages                            | 2 (probable)                  | 2 (intact) + 1 (probable)      |

48

49 **Table S3. Overview of core genes and genes specific to ScottA and to EGD-e.**

50 The subsets of core and strain-specific protein-coding genes are listed for both strains (see separate  
51 Excel table). Detailed functional annotation is provided. The 14 genes that were missing in the NCBI  
52 reference sequence of ScottA (CM001159.1) are highlighted in orange. Strain-specific genes that are  
53 represented in the spectral libraries are marked “TRUE” in the column “present in spectral\_library”.  
54

55 **Table S4. Gene Ontology (GO) categories enriched among the strain-specific and differentially**  
56 **expressed proteins of each strain.**

57 See separate excel table.  
58

59 **Table S5. Master table.**

60 The list of all protein-coding genes in the *de novo* assembled strains, their functional annotations  
61 (NCBI and additional functional annotations; see Materials and Methods), proteomics expression  
62 evidence obtained using MS-GF+ after filtering for PSM level FDR of 0.05% (protein level FDR 1%), as  
63 well as the results of a reciprocal best BLAST hit analyses with the ListiList strain EGD-e (facilitating  
64 integration with other datasets) and its corresponding Uniprot accession are shown in a separate  
65 Excel file.  
66

67 **Table S6. Summary of annotation clusters in the iPtgxDBs.**

68 A. EGD-e (65,393 proteins)

| Annotation source (prefix)  | # total CDS | # total clusters | # total new clusters | # total new reductions | # total new extensions | # total clusters | # total ids |
|-----------------------------|-------------|------------------|----------------------|------------------------|------------------------|------------------|-------------|
| RefSeq (refseq)             | 2,919       | 2,919            | 2,919                | 0                      | 0                      | 2,919            | 2,919       |
| Prodigal (prod)             | 2,877       | 2,877            | 34                   | 80                     | 84                     | 2,953            | 3,117       |
| <i>In silico</i> ORFs (orf) | 67,980      | 48,406           | 45,466               | 31                     | 18,847                 | 48,419           | 67,461*     |

69 \*Excluded were 1,989 proteins smaller than 6 amino acids; 29 entries were annotated as pseudogene  
70 by both RefSeq and Prodigal annotation sources and hence excluded from the iPtgxDB; 50 shorter  
71 entries had indistinguishable internal start sites and were also excluded from the iPtgxDB.

72

73

74 B. ScottA (67,150 proteins)

| Annotation source (prefix)  | # total CDS | # total clusters | # total new clusters | # total new reductions | # total new extensions | # total clusters | # total ids |
|-----------------------------|-------------|------------------|----------------------|------------------------|------------------------|------------------|-------------|
| RefSeq (refseq)             | 3,010       | 3,010            | 3,010                | 0                      | 0                      | 3,010            | 3,010       |
| Prodigal (prod)             | 2,970       | 2,970            | 48                   | 75                     | 89                     | 3,058            | 3,222       |
| <i>In silico</i> ORFs (orf) | 69,931      | 49,726           | 46,677               | 23                     | 19,433                 | 49,735           | 69,355*     |

75 \*Excluded were 2,122 proteins smaller than 6 amino acids; 30 entries were annotated as pseudogene  
76 by both RefSeq and Prodigal annotation sources and hence excluded from the iPtgxDB; 53 shorter  
77 entries had indistinguishable internal start sites and were also excluded from the iPtgxDB.

78

79 **Table S7. Spectral evidence for the novelties identified through the proteogenomics search using**  
80 **MS-GF+ of DDA data for *L. monocytogenes* strains EGD-e and ScottA.**

81 Annotated mass spectra and matching scores derived from Proteome Discoverer v2.4 (MS Amanda  
82 search engine) for peptides supporting novel proteins and short ORFs are provided. See separate  
83 Excel table.

84 **Table S8: Summary information of precursors, peptides, and protein groups identified for EGD-e**  
85 **and ScottA over all conditions using DIA.**

|                                            | <b>EGD-e</b> | <b>ScottA</b> |
|--------------------------------------------|--------------|---------------|
| <b>Precursors</b>                          | 22,993       | 25,585        |
| <b>Peptides</b>                            | 16,725       | 16,635        |
| <b>Modified Peptides</b>                   | 19,002       | 21,169        |
| <b>Protein Groups</b>                      | 1,708        | 1,876         |
| <b>Precursor recovery from library [%]</b> | 90.8         | 97.5          |

86

87 **Table S9. Summary of library recovery percentage, data completeness, and median CVs for the DIA**  
88 **dataset. Part of this dataset is also shown in Fig 6.**

|                          | <b>EGD-e</b>   |               |                        |                   | <b>ScottA</b>  |               |                        |                   |
|--------------------------|----------------|---------------|------------------------|-------------------|----------------|---------------|------------------------|-------------------|
| <b>Condition</b>         | <b>Control</b> | <b>Low pH</b> | <b>High osmolarity</b> | <b>Bile salts</b> | <b>Control</b> | <b>Low pH</b> | <b>High osmolarity</b> | <b>Bile salts</b> |
| <b>Data completeness</b> | 85%            | 84%           | 81%                    | 35%               | 91%            | 80%           | 87%                    | 51%               |
| <b>Library recovery</b>  | 85%            | 85%           | 82%                    | 36%               | 95%            | 88%           | 92%                    | 65%               |
| <b>Median CVs</b>        | 17%            | 19%           | 17%                    | 20%               | 20%            | 21%           | 17%                    | 81%               |

89

90 **Table S10. List of differentially abundant proteins.**

91 Proteins identified as differentially abundant in the bile, low pH, and high osmolarity conditions for  
92 both strains. Strain-specific genes are highlighted in orange. See separate Excel table.

93

94 **Table S11. Candidate genes for bile resistance and operons for flagellar genes.**

95 List of *Listeria* genes previously shown to be involved in bile resistance and genes that are part of two  
96 operons with flagellar-related and motility genes that flank the *flaA* gene (Bécavin C, et al.  
97 Comparison of widely used *Listeria monocytogenes* strains EGD, 10403S, and EGD-e highlights  
98 genomic variations underlying differences in pathogenicity. MBio. 2014;5: e00969–14). See separate  
99 Excel table.
